# Supplementary material for: Metabolic Response to Heat Stress in Late-Pregnant and Early Lactation Dairy Cows: Implications to Liver-Muscle Crosstalk
Source: PubMed Central journal article supplement (PMC4981427; doi:10.1371/journal.pone.0160912), 2016-08-11
Supplement: pone.0160912.s001.pdf [file pone.0160912.s001.pdf]

## Supporting Information

**S1 Table. Primer sequences and real-time PCR conditions.**

| Gene          |         | Primer sequence (5' to 3') | GenBank accession no. | Product Size (base pairs) | Annealing (°C / s) | Efficiency         |
|---------------|---------|----------------------------|-----------------------|---------------------------|--------------------|--------------------|
| <i>ACAA1</i>  | forward | TGTCCCTAGCTGACAGAGGG       | NM_001034319.2        | 162                       | 60                 | 1.878 <sup>1</sup> |
|               | reverse | GGGAAGCCAGTGCAAAGGTA       |                       |                           |                    | 1.902 <sup>m</sup> |
| <i>ACAA2</i>  | forward | TGAATGAAGCTTTTGCCTCCTC     | NM_001035342          | 224                       | 60                 | 1.876              |
|               | reverse | GATGATGACCGCAATTCCTT       |                       |                           |                    | 60                 |
| <i>ACADVL</i> | forward | AATGGAAGGTTTGGCATGGC       | NM_174494             | 125                       | 59                 | 1.890 <sup>1</sup> |
|               | reverse | TGGATCAGCCCAAAGTTGTG       |                       |                           |                    | 1.899 <sup>m</sup> |
| <i>ACOX1</i>  | forward | TTGTGGCGGACATGGCTATT       | NM_001035289.3        | 148                       | 60                 | 1.877 <sup>1</sup> |
|               | reverse | TGAGTGCACCTGGTCGTAAC       |                       |                           |                    | 1.923 <sup>m</sup> |
| <i>ACOX2</i>  | forward | AACATGCTGAATCGCTTCGC       | NM_001102015.2        | 89                        | 60                 | 1.865              |
|               | reverse | ACCACCATGCTGAGGTAGTTAC     |                       |                           |                    | 60                 |
| <i>ASL</i>    | forward | GTGGCCACTGGTGTCTCTCT       | NM_001034428          | 58                        | 62                 | 1.910              |
|               | reverse | GAGCCCGTCCCATGTTCTC        |                       |                           |                    | 62                 |
| <i>ATB5b</i>  | forward | TGCTTTATTGGGCAGAATCC       | NM_175796             | 152                       | 58                 | 1.858              |
|               | reverse | GATCCGTCAAGTCATCAGCA       |                       |                           |                    | 58                 |
| <i>CAPN1</i>  | forward | TTTCCAGCTGTGGCAGTTTG       | NM_174259             | 89                        | 59                 | 1.908              |
|               | reverse | AGTGCACAAACACCAGCTTC       |                       |                           |                    | 59                 |
| <i>CAPN2</i>  | forward | ACTGCCCAAACCTGGAACACA      | NM_001103086          | 148                       | 60                 | 1.894              |
|               | reverse | GTGAGTGTGTCAGGGGTCAG       |                       |                           |                    | 60                 |
| <i>CAT</i>    | forward | TCACTCAGGTGCGACTTTC        | NM_001035386.2        | 162                       | 60                 | 1.872              |
|               | reverse | GGATGCGGGAGCCATATTCA       |                       |                           |                    | 60                 |
| <i>CLN3</i>   | forward | TTCTGACTCCTTGGGACACA       | NM_001075174          | 62                        | 60                 | 1.953              |
|               | reverse | CAACCTGCCCACCTATCAGT       |                       |                           |                    | 60                 |
| <i>CPS</i>    | forward | GGTGGCTTGCTTTGGTGAAG       | NM_001192258          | 188                       | 60                 | 1.888              |
|               | reverse | AGTCTGATGTGGCTTCCGTG       |                       |                           |                    | 60                 |
| <i>CS</i>     | forward | TGGACATGATGTATGGTGG        | NM_001044721          | 217                       | 60                 | 1.826              |
|               | reverse | AGCCAAGATACCTGTTCTC        |                       |                           |                    | 60                 |
| <i>EMD</i>    | forward | GCCCTCAGCTTCACTCTCAGA      | NM_203361             | 100                       | 59                 | 1.915              |
|               | reverse | GAGGCGTTCCCGATCCTT         |                       |                           |                    | 59                 |
| <i>FOXO3</i>  | forward | TCCAGACAAACGGCTCACTC       | NM_001206083          | 172                       | 60                 | 1.877              |
|               | reverse | CTTGCCGGTTCCTCATTCT        |                       |                           |                    | 60                 |
| <i>GPT2</i>   | forward | TGTACCTGCAGACCCGGATA       | NM_001193187          | 167                       | 60                 | 1.881              |
|               | reverse | TGGCATCGAGTTCGGAGATG       |                       |                           |                    | 60                 |
| <i>HADH</i>   | forward | AACACCAATGACCAGCCAGA       | NM_001046334.1        | 150                       | 58                 | 1.887 <sup>1</sup> |
|               | reverse | TCACACAGCCTGACTGCTTC       |                       |                           |                    | 1.924 <sup>m</sup> |
| <i>HPCALI</i> | forward | CCATCGACTTCAGGGAGTTC       | NM_001098964          | 99                        | 60                 | 1.907              |
|               | reverse | CGTCGAGGTCATACATGCTG       |                       |                           |                    | 60                 |
| <i>LDHA</i>   | forward | TGGGGAGCATGGTACTCTA        | NM_174099.2           | 187                       | 60                 | 1.882 <sup>1</sup> |
|               | reverse | AATGGCCCAGGATGTGTAGC       |                       |                           |                    | 1.889 <sup>m</sup> |
| <i>LDHB</i>   | forward | ACTTGGCATTATCCAGCA         | NM_174100             | 90                        | 60                 | 1.912              |

|                 |         |                        |                                 |     |    |                    |
|-----------------|---------|------------------------|---------------------------------|-----|----|--------------------|
|                 | reverse | GCCACATTCACTCCACTCCA   |                                 |     | 60 |                    |
| <i>LRP10</i>    | forward | CCAGAGGATGAGGACGATGT   | NM_001100371.1                  | 139 | 60 | 1.896 <sup>1</sup> |
|                 | reverse | ATAGGGTTGCTGTCCCTGTG   |                                 |     | 60 | 1.908 <sup>m</sup> |
| <i>ND2</i>      | forward | CATGCTCCGAAACTCTGACA   | NM_174565.3                     | 129 | 58 | 1.866              |
|                 | reverse | GCATTTACACAGGCCCTAA    |                                 |     | 58 |                    |
| <i>PC</i>       | forward | ACACCAACTACCCGACAATG   | NM_177946.4                     | 353 | 60 | 1.867              |
|                 | reverse | CAGCGGGAGGTCAGGGAAG    |                                 |     | 60 |                    |
| <i>PCK1</i>     | forward | CAACTCTCGCTTTTGTGCC    | NM_174737.2                     | 122 | 60 | 1.869              |
|                 | reverse | GGGGGACTCCTTTGGGTCTA   |                                 |     | 60 |                    |
| <i>PCK2</i>     | forward | CAAGGATGGGGAGCCTTGTG   | NM_001205594.1                  | 162 | 62 | 1.888              |
|                 | reverse | CCTCCGAAGATGATGCCCTC   |                                 |     | 62 |                    |
| <i>PDK2</i>     | forward | AACCCAGCAATGTTTCTGC    | NM_001159481,<br>NM_001075853.2 | 70  | 59 | 1.91               |
|                 | reverse | TGGGTAGGTGTATGCACATGAG |                                 |     | 59 |                    |
| <i>PDK4</i>     | forward | AGGTTTTCACGCTGTGGATG   | NM_001101883                    | 95  | 59 | 1.856              |
|                 | reverse | AAAGTGCCATATGCGTACGC   |                                 |     | 59 |                    |
| <i>PPARA</i>    | forward | CAGAACAAGGAGGCGGAAGT   | NM_001034036                    | 215 | 60 | 1.893              |
|                 | reverse | CCGTAGGCTACCAACATCCC   |                                 |     | 60 |                    |
| <i>PPARGCIA</i> | forward | CCTGCATGAGTGTGTGCTCT   | NM_177945.3                     | 158 | 60 | 1.911              |
|                 | reverse | GCAAAGAGGCTGGTCTTAC    |                                 |     | 60 |                    |
| <i>UBB</i>      | forward | TCTGAGGGGTGGCTGTTAATC  | NM_174133                       | 76  | 60 | 1.91               |
|                 | reverse | ATGGCTAGAGTGCAGAAGGATG |                                 |     | 60 |                    |
| <i>UBA52</i>    | forward | GGCAAGACCATCACCCCTGA   | NM_001076363.2                  | 220 | 62 | 1.876              |
|                 | reverse | GGAGGGAAGGCTCGATGATG   |                                 |     | 62 |                    |

<sup>1</sup> liver

<sup>m</sup> skeletal muscle
